# Supplementary material for: Taxonomic and functional stability overrules seasonality in polar benthic microbiomes
Source: PubMed Central journal article supplement (PMC10811738; doi:10.1093/ismejo/wrad005), 2024-01-10
Supplement: miksch_supplementary_information_wrad005.pdf [file miksch_supplementary_information_wrad005.pdf]

## **Supplementary Information**

### **Taxonomic and functional stability overrules seasonality in polar benthic microbiomes**

Sebastian Miksch<sup>1</sup>, Luis H. Orellana<sup>1</sup>, Monike Oggerin de Orube<sup>1</sup>, Silvia Vidal-Melgosa<sup>1,2</sup>,  
Vipul Solanki<sup>1</sup>, Jan-Hendrik Hehemann<sup>1,2</sup>, Rudolf Amann<sup>1</sup>, Katrin Knittel<sup>1\*</sup>

<sup>1</sup> Max Planck Institute for Marine Microbiology, Bremen, Germany

<sup>2</sup> MARUM, Center for Marine Environmental Sciences, University of Bremen, Bremen,  
Germany

## Supplementary Materials and Methods

### RNA extraction

RNA was extracted from sediment samples from Dec 2017, Feb 2018, and May 2018 from stations 5 and 7 using RNeasy PowerSoil Total RNA Kit (QIAGEN, Hilden, Germany) with some modifications to the manufacturer's recommendation. For May 2018 sediments, RNA was extracted from station 5 from three technical replicate samples.

Modifications were as follows:

- fresh phenol/chloroform/isoamyl alcohol (pH 6.5-8.0) was added to the tube containing the beads before adding the sample.
- As only up to 2.0 g of sample can be used per tube, we subsampled each sample, performing two to five extractions per sample. In particular for winter samples, several replicates were extracted and finally combined to retrieve an amount of RNA that is sufficiently high for metatranscriptomics.
- The incubation from step 7 of the manufacturer's protocol was performed on ice and the centrifugation was done at 3000 x g.
- The centrifugation speed used in step 10 was 5000 x g.
- The last incubation (step 17) was done at -20° C for 30 minutes.
- The centrifugation (step 18) was performed at 15000 x g for 30 minutes.
- For resuspension of the nucleic acid pellet, a smaller volume between 25 to 50 µl of SR7 solution was used.
- Contaminating DNA was digested by using the Invitrogen™ TURBO DNA-free™ Kit (Thermo Fisher Scientific, Bremen, Germany) following the manufacturers' protocol.

## **Sequence assembly and binning**

Sequences were quality-controlled using BBTools v37.62 (quality < 20, minimum length 140 nt per read). Quality controlled reads were analyzed for their coverage of sequence diversity using nonpareil v3.303 [1]. Assembly of reads into contigs was done with SPAdes v3.13.1 [2] using k-mers 55, 77, 99, 127 and the meta option and assembly only. Assembly quality was evaluated using QUAST v4.5 [3]. Contigs < 1 kb length were excluded from further analyses. For each dataset, binning was done using MaxBin v2.2.7 [4] at default settings and using MetaBAT v2:2.15 [5] at default settings and `-m 1500`. Bin refinement was performed using DAS\_Tool v1.1.2 at default settings [6]. Mapping for differential coverage binning was done using bbmap v38.70 and default settings [7] except for `minid=0.99` and `idfilter=0.97`. De-replication of bins retrieved by DAS\_Tool from all datasets was performed with Rep v3.1.1 [8] at default settings except for parameters `-g 35`, `-l 1000`, `-comp 50`, `-con 15` and classified using the GTDB-Tk v2.1.1 [9] and GTDB release r214. Completeness and contamination was assessed in checkM v1.0.7 [10].

## **Gene annotation and analyses**

Gene predictions from bins were done using Prokka v1.14.6 [11], dbCAN (run\_dbCAN v2.0.11 workflow; [https://github.com/linnabrown/run\\_dbcan](https://github.com/linnabrown/run_dbcan)) [12], Swiss-Prot release 2021\_04 [13], SulfAtlas v1.0 [14], and transporterDB [download Oct21, 15]. The latter three databases were searched using DIAMOND blastp mode and default settings. Results were filtered for the best hit using the `enveomics` script `BlastTab.best_hit_sorted` [16] and >60% identity to reference sequences and a query coverage of >70%.

CAZyme annotations obtained from dbCAN were accepted when two of the three integrated annotation methods (HMMER v3.3.2, DIAMOND v2.0.9.147, Hotpep version included in run\_dbCAN workflow) matched [12]. The annotations from Prokka and the databases (except

for dbCAN) were compared using a semi-automated approach. This comparison was done using a full Damerau-Levenshtein distance [17, 18] between the annotations from different tools/databases (0, identical string; 1, completely different). To account for discrepancies in the annotation string for identical functions in different databases (e.g. capitalization, extra spaces, extra letters), differences  $\leq 25\%$  of total string lengths were allowed. Results were sorted according to i) annotated function matching in at least two of the four databases, ii) only one database annotated the predicted gene (results marked with “\*” at the end of the string) or iii), annotated function disagreed between databases (marked with “manualcheck\_”). Metagenomic abundance was calculated as gene counts divided by genome equivalents that were estimated using MicrobeCensus [19].

### **Transcriptomic analyses**

Quality-controlled RNA reads were sorted using SortMeRNA 4.0.4 [20] using default settings. Reads classified as rRNA were used for taxonomic profiling by using the SILVAngs pipeline [<https://ngs.arb-silva.de/silvangs/>, release 138.1, 21] and default settings. For expression analysis, all reads not classified as rRNA or tRNA, were considered as mRNA.

Annotation of transcripts was done by mapping mRNA to predicted genes from metagenomic contigs and bins using DIAMOND blastx [v2.0.15.153, 22] at default settings. Results were filtered for the best hit using the enveomics script BlastTab.best\_hit\_sorted [16] and  $>60\%$  identity to reference sequences and a query coverage of  $>70\%$ . Values of transcripts per million (TPM) mapped reads were calculated after normalization by gene length. Differences between seasons were calculated using the average TPM values in winter (December and February) vs. spring (May) and given as  $\log_2$  fold change.

Data transformation and plotting was done using R and the tidyverse packages [23, 24].

### **Prediction of monosaccharide composition based on expression of GH genes.**

For each GH family, all enzyme activities given in the CAZy database were extracted. Each enzyme activity is referred to one or several monosaccharide released/degraded. The number of different enzymes which can be referred to a specific monosaccharide is determined for each GH family and given in Supplementary Table S7. For the analysis, each enzyme activity given in the CAZy database is considered equally important. For example, for GH1, the following sugars are proposed based on 27 enzyme names: galactose (deduced from 3 enzyme names), glucose (deduced from 18 enzyme names), arabinose, fucose, glucuronic acid, rhamnose, mannose, and xylose (each deduced from 1 enzyme name). In a second step, TPM of expressed GHs were “translated” to the fraction a specific sugar account for by considering the relative contribution of this specific sugar to the GH family. For example, for GH1, release of glucose was predicted based on 18 out of 27 assignments, i.e. contributing 2/3 of total sugars. The final predicted monosaccharide composition is obtained by summing up the contributions of each sugars for each GH family. The script with detailed information is deposited on GitLab under [https://gitlab.mpi-bremen.de/smiksch/gh\\_family\\_to\\_monosaccharides](https://gitlab.mpi-bremen.de/smiksch/gh_family_to_monosaccharides)

### **Monosaccharide analysis**

Freeze-dried sediment was homogenized and mixed with 5 ml Milli-Q ultrapure water per mg of sediment and incubated in a sonication bath (Bandelin Sonorex<sup>®</sup>, Berlin, Germany) for 60 min at maximum intensity. Afterwards, samples were centrifuged at 6000 x g for 15 min at 20° C and the supernatant was preserved. Porewater and OSW were dialyzed to remove salts using ~1 kDa mesh size dialysis bags (Spectra/Por<sup>®</sup>, Fisher Scientific, Bremen, Germany) for 24 h against Milli-Q water. Dialyzed samples were freeze-dried and re-suspended in a tenth of the

original volume. Both sediment extracts and pore water and overlying sea water samples were hydrolyzed using HCl (1 M final concentration) for 24 h. Monosaccharides were quantified using High performance anion exchange chromatography (HPAEC) with pulsed amperometric detection (PAD) for details see Vidal-Melgosa *et. al.* [25].

## References

1. Rodriguez-R LM, Konstantinidis KT. Nonpareil: a redundancy-based approach to assess the level of coverage in metagenomic datasets. *Bioinformatics*. 2013;30:629-35.
2. Bankevich A, Nurk S, Antipov D, Gurevich AA, Dvorkin M, Kulikov AS, et al. SPAdes: A new genome assembly algorithm and its applications to single-cell sequencing. *J Comput Biol*. 2012;19:455-77.
3. Gurevich A, Saveliev V, Vyahhi N, Tesler G. QUASt: quality assessment tool for genome assemblies. *Bioinformatics*. 2013;29:1072-5.
4. Wu YW, Tang YH, Tringe SG, Simmons BA, Singer SW. MaxBin: an automated binning method to recover individual genomes from metagenomes using an expectation-maximization algorithm. *Microbiome*. 2014;2.
5. Kang DD, Li F, Kirton E, Thomas A, Egan R, An H, et al. MetaBAT 2: an adaptive binning algorithm for robust and efficient genome reconstruction from metagenome assemblies. *PeerJ*. 2019;7:e7359-e.
6. Sieber CMK, Probst AJ, Sharrar A, Thomas BC, Hess M, Tringe SG, et al. Recovery of genomes from metagenomes via a dereplication, aggregation and scoring strategy. *Nature Microbiol*. 2018;3:836-43.
7. Bushnell B, Rood J, Singer E. BBMerge - Accurate paired shotgun read merging via overlap. *PLoS One*. 2017;12:e0185056.
8. Olm MR, Brown CT, Brooks B, Banfield JF. dRep: a tool for fast and accurate genomic comparisons that enables improved genome recovery from metagenomes through dereplication. *ISME J*. 2017;11:2864-8.
9. Chaumeil P-A, Mussig AJ, Hugenholtz P, Parks DH. GTDB-Tk: a toolkit to classify genomes with the Genome Taxonomy Database. *Bioinformatics*. 2019;36:1925-7.
10. Parks DH, Imelfort M, Skennerton CT, Hugenholtz P, Tyson GW. CheckM: assessing the quality of microbial genomes recovered from isolates, single cells, and metagenomes. *Genome Res*. 2015;25:1043-55.
11. Seemann T. Prokka: rapid prokaryotic genome annotation. *Bioinformatics*. 2014;30:2068-9.

12. Huang L, Zhang H, Wu P, Entwistle S, Li X, Yohe T, et al. dbCAN-seq: a database of carbohydrate-active enzyme (CAZyme) sequence and annotation. *Nucleic Acids Res.* 2017;46:D516-D21.
13. Consortium TU. UniProt: the universal protein knowledgebase in 2021. *Nucleic Acids Res.* 2020;49:D480-D9.
14. Barbeyron T, Brillet-Guéguen L, Carré W, Carrière C, Caron C, Czjzek M, et al. Matching the diversity of sulfated biomolecules: creation of a classification database for sulfatases reflecting their substrate specificity. *PLoS One.* 2016;11:e0164846-e.
15. Elbourne LDH, Tetu SG, Hassan KA, Paulsen IT. TransportDB 2.0: a database for exploring membrane transporters in sequenced genomes from all domains of life. *Nucleic Acids Res.* 2016;45:D320-D4.
16. Rodriguez-R LM, Konstantinidis KT. The enveomics collection: a toolbox for specialized analyses of microbial genomes and metagenomes. *PeerJ Preprints.* 2016;4:e1900v1.
17. Levenshtein VI. Binary codes capable of correcting deletions, insertions, and reversals. *Soviet Physics Doklady.* 1966;10:707–10.
18. Damerau F. A technique for computer detection and correction of spelling errors. *Communications of the ACM.* 1964;7:171–6.
19. Nayfach S, Pollard KS. Average genome size estimation improves comparative metagenomics and sheds light on the functional ecology of the human microbiome. *Genome Biology.* 2015;16:51.
20. Kopylova E, Noé L, Touzet H. SortMeRNA: fast and accurate filtering of ribosomal RNAs in metatranscriptomic data. *Bioinformatics.* 2012;28:3211-7.
21. Quast C, Pruesse E, Yilmaz P, Gerken J, Schweer T, Yarza P, et al. The SILVA ribosomal RNA gene database project: improved data processing and web-based tools. *Nucleic Acids Res.* 2013;41:D590-D6.
22. Buchfink B, Reuter K, Drost H-G. Sensitive protein alignments at tree-of-life scale using DIAMOND. *Nat Methods.* 2021;18:366-8.
23. Team RC. R: A language and environment for statistical computing. Vienna, Austria: R Foundation for Statistical Computing, URL <https://www.r-project.org/>; 2019.
24. Wickham H, Averick M, Bryan J, Chang W, McGowan L, François R, et al. Welcome to the Tidyverse. *J Open Source Softw.* 2019;4:1686.
25. Vidal-Melgosa S, Sichert A, Francis TB, Bartosik D, Niggemann J, Wichels A, et al. Diatom fucan polysaccharide precipitates carbon during algal blooms. *Nat Commun.* 2021;12:1150.

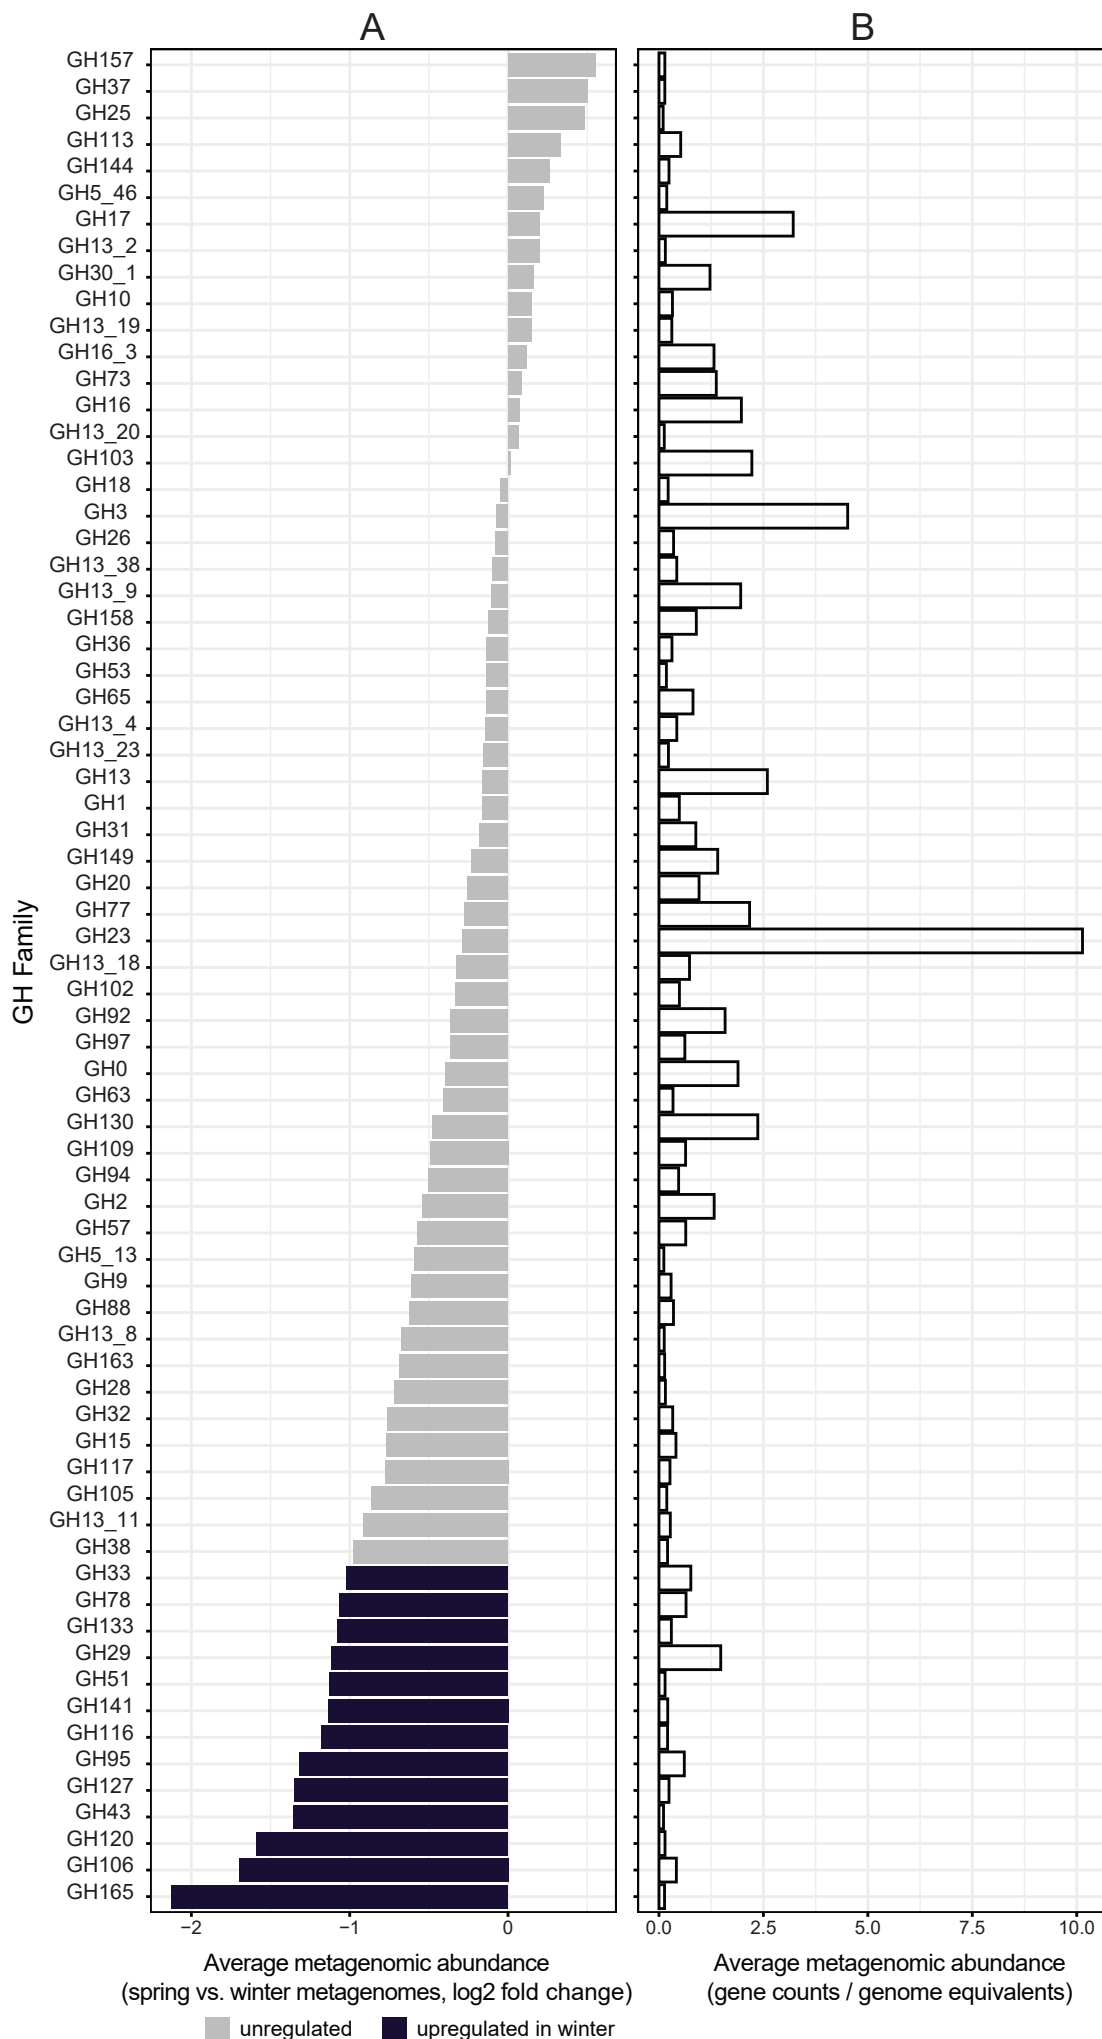

**Supplementary Figure S1: Glycoside hydrolase families in the metagenomes. (A)** Changes in average abundance of GH in spring metagenomes compared to winter metagenomes (calculated by abundance in spring / abundance in winter, given as log<sub>2</sub> fold change), **(B)** average abundance in metagenomes (calculated by gene counts / genome equivalents estimated using MicrobeCensus) . Only GH families with > 0.1% average abundance are shown.



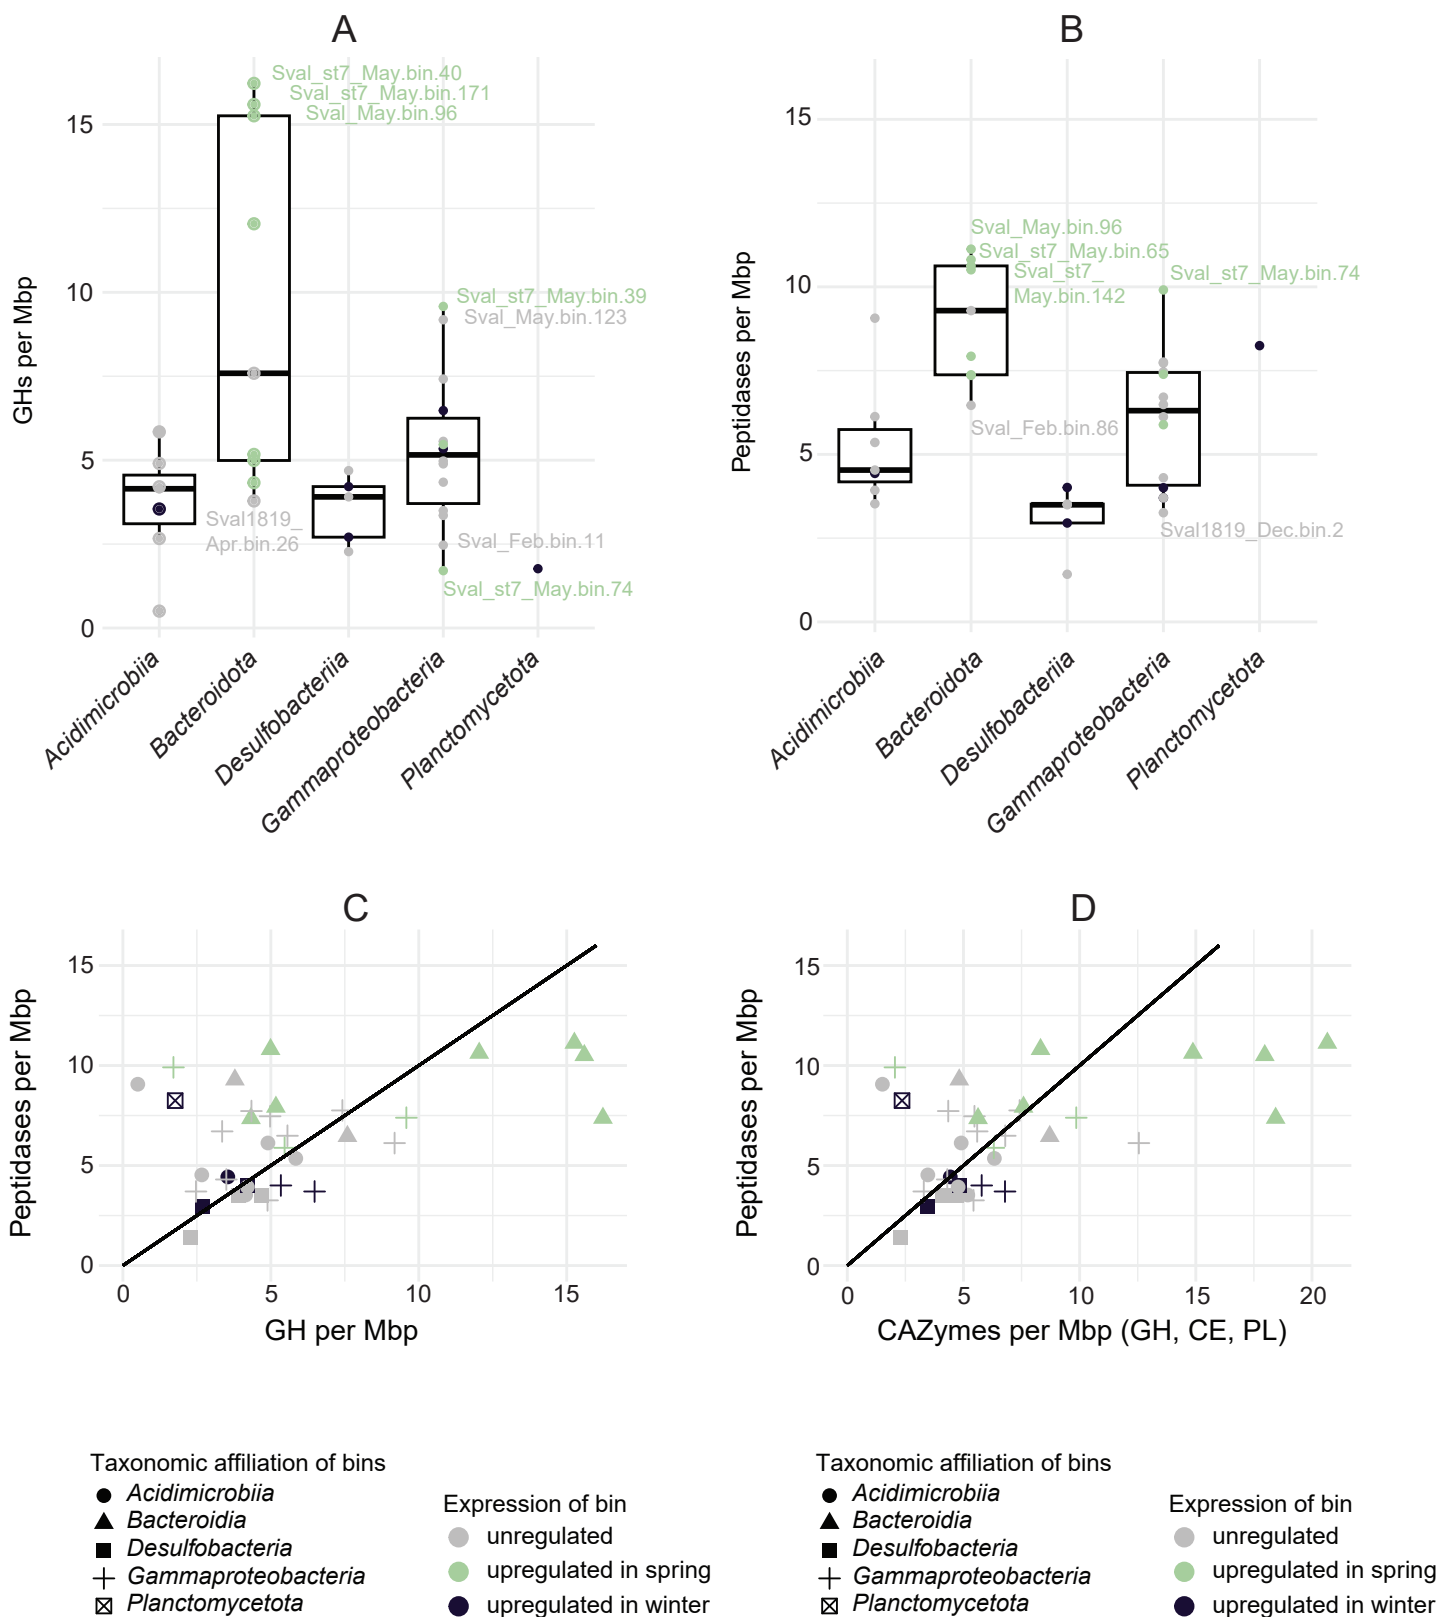

**Supplementary Figure S2.** Comparison of degradative CAZymes (GH +PL + CE) and peptidases repertoires in Svalbard *Acidimicrobiia*, *Bacteroidia*, *Gammaproteobacteria*, *Desulfobacteria*, and *Planctomycetota* bins. Abundance of (A) GH given per Mbp in bin, (B) peptidases, (C) GH versus peptidases to identify bins that represent specialists for carbohydrate degradation or protein degradation, and (D) CAZymes (sum of GH, CE, PL) versus peptidases. Gene abundances were normalized by bin size. GH, glycoside hydrolases; CE, carbohydrate esterases, PL, polysaccharide lyases.

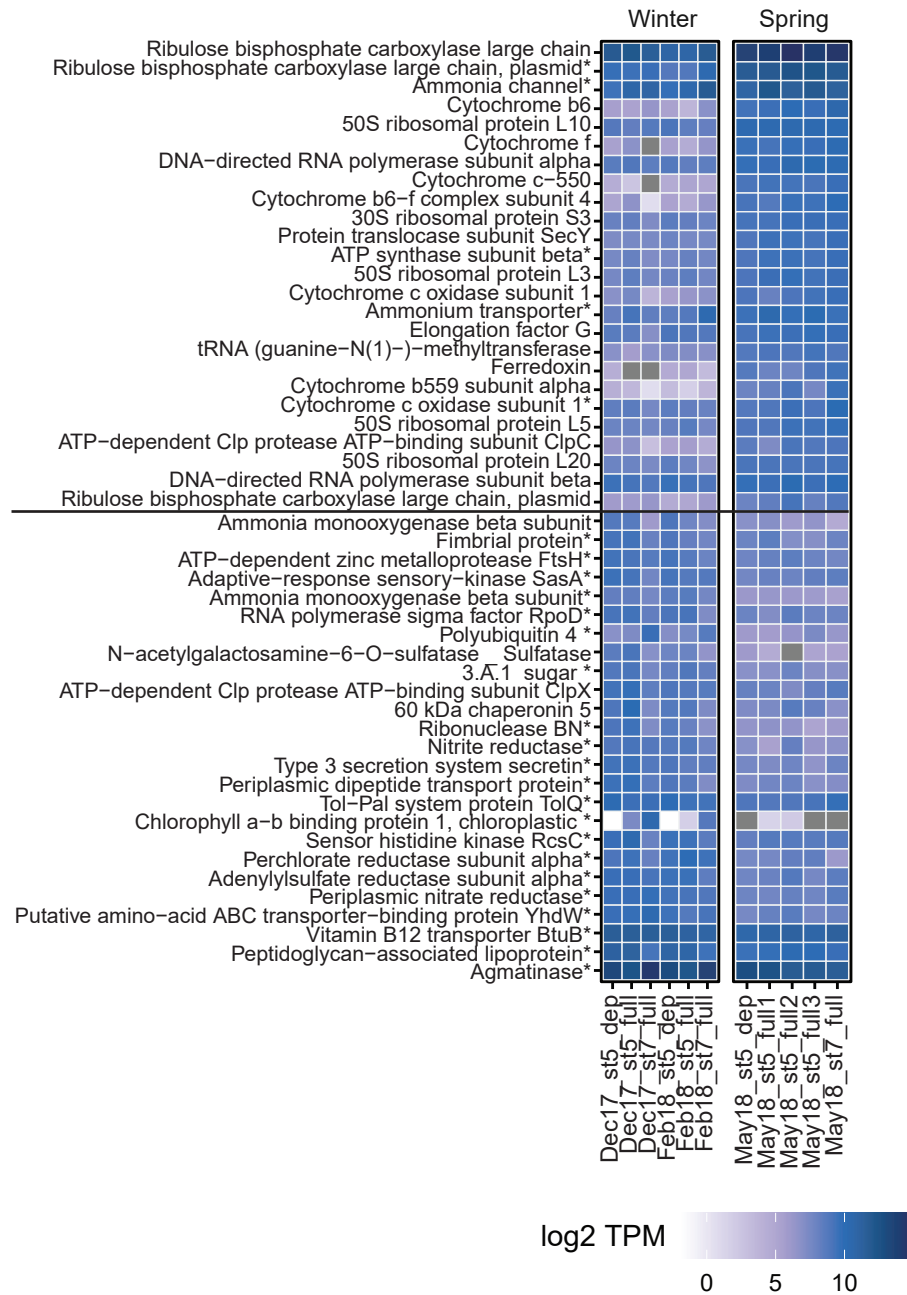

**Supplementary Figure S3: Top 25 most expressed genes in winter (n=6) and spring (n=5) metatranscriptomes from Svalbard sediments [transcripts per million (TPM), given on a log<sub>2</sub> scale].** Genes above the horizontal line are more expressed in spring while genes below are more expressed in winter. Genes, which could only be annotated by one of the used database, are marked by \*. Grey tiles are infinite values after log transformation.

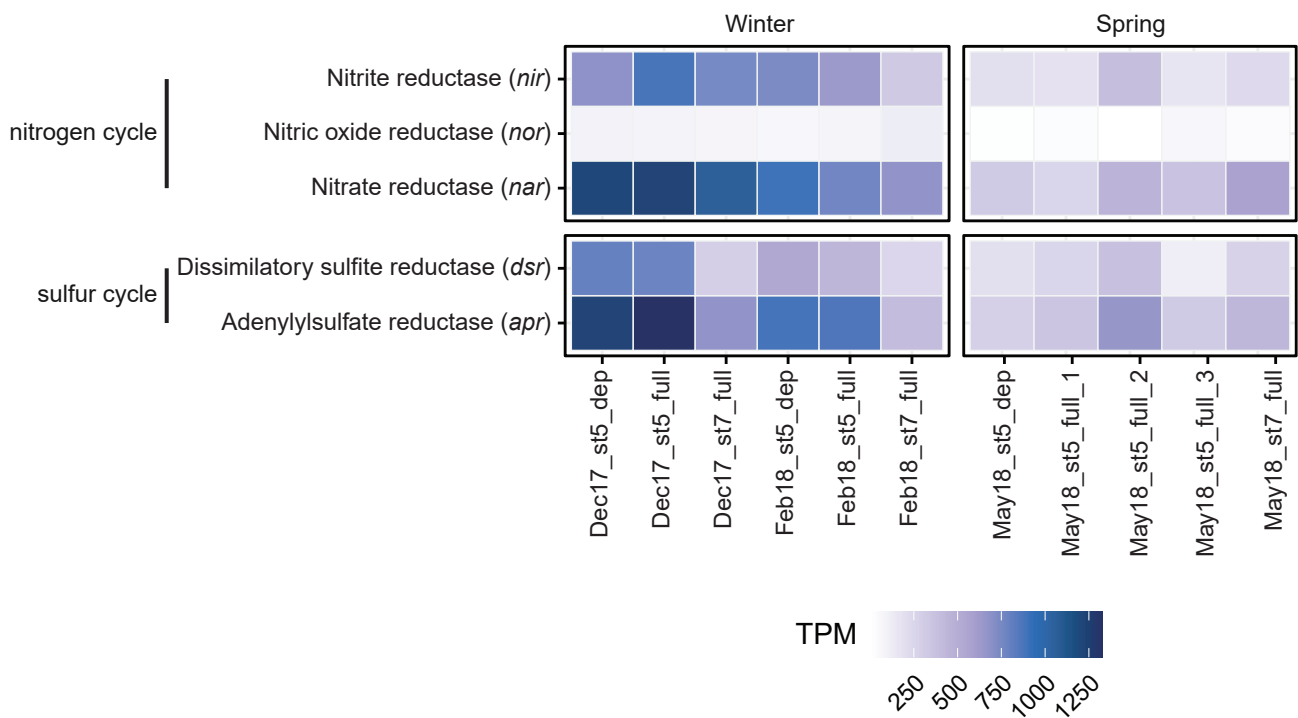

**Supplementary Figure S4: Expression of key genes involved in nitrogen and sulfur cycling in Svalbard sediments.** Abundances in winter and spring metatranscriptomes are shown in transcripts per million (TPM) reads. In particular, *nar* (nitrite reductase), *dsr* (dissimilatory sulfite reductase), and *apr* (adenylylsulfate reductase) were strongly upregulated in winter compared to spring.

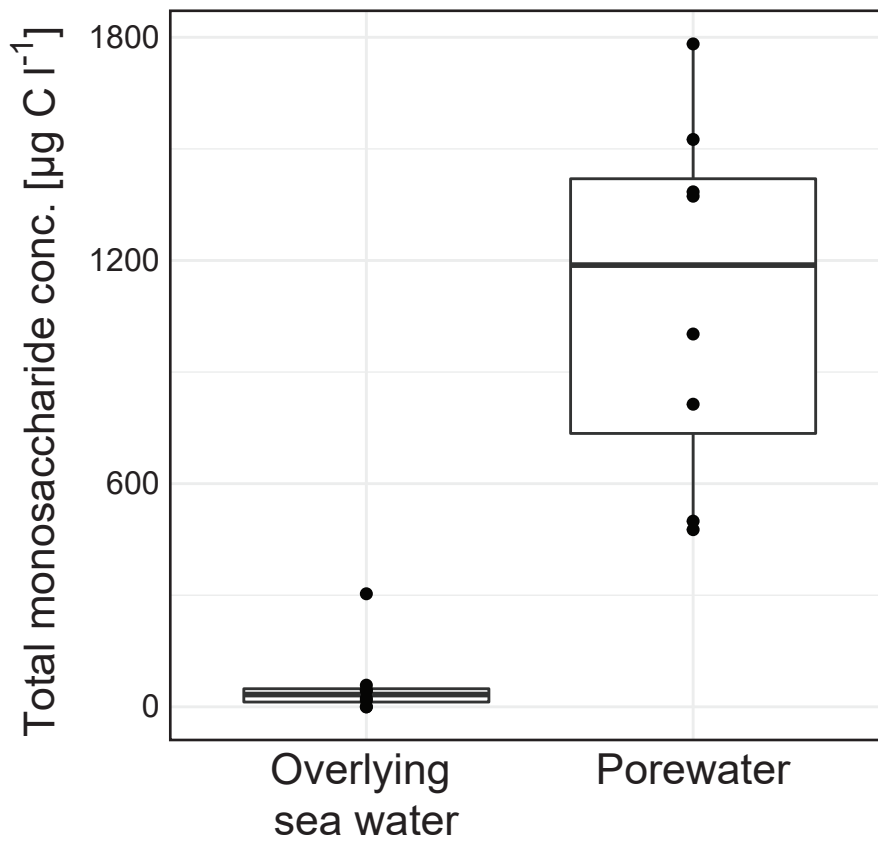

**Supplementary Figure S5. Glycan concentrations in overlying seawater and porewater samples from Svalbard Isfjorden.** Glycans from OSW and porewater were acid hydrolyzed and the resulting monosaccharides were measured by HPAEC-PAD analysis. Total monosaccharide concentration (sum of concentrations of all different monosaccharides) is shown. Concentrations in porewater were 18fold higher than in OSW. For concentrations of different monosaccharides refer to Supplementary Table S6.

A

| Bin ID                  | reg.* Contig ID | Genomic organization of CAZymes°                                                                            | predicted substrate usage (www.cazy.org) |
|-------------------------|-----------------|-------------------------------------------------------------------------------------------------------------|------------------------------------------|
| Sval_st7_May<br>.bin.39 | NODE_292        | start of contig, ..., GH30_1, CBM9, GH17, GH17, GH149, CBM57+GH16_3, GH17, GH16_3, GH16_3, CBM32+CBM56+CBM6 | laminarin, $\beta$ -glycans              |
|                         | NODE_3883       | start of contig, ..., GH77, GH13+GH77+CBM48, GT35, CBM48+GH13_9                                             | glycogen, $\alpha$ -glycans              |

\* , reg., regulation. Bins upregulated in spring (green), assignment taken from Figure 3

° , PUL-like loci, based on the presence of  $\geq 2$  CAZyme within a 10-genes-sliding window

other CAZymes and CBM in contigs not matching the criteria and PUL-like loci: GH0+GH94+GT84, GH3, GH73, GH103, GH16\_21, CBM50+GH23, GH23, GH13+CBM41+CBM48, GH42, GH13\_18, GH3+GH30+CBM6, GH37, CE11

B

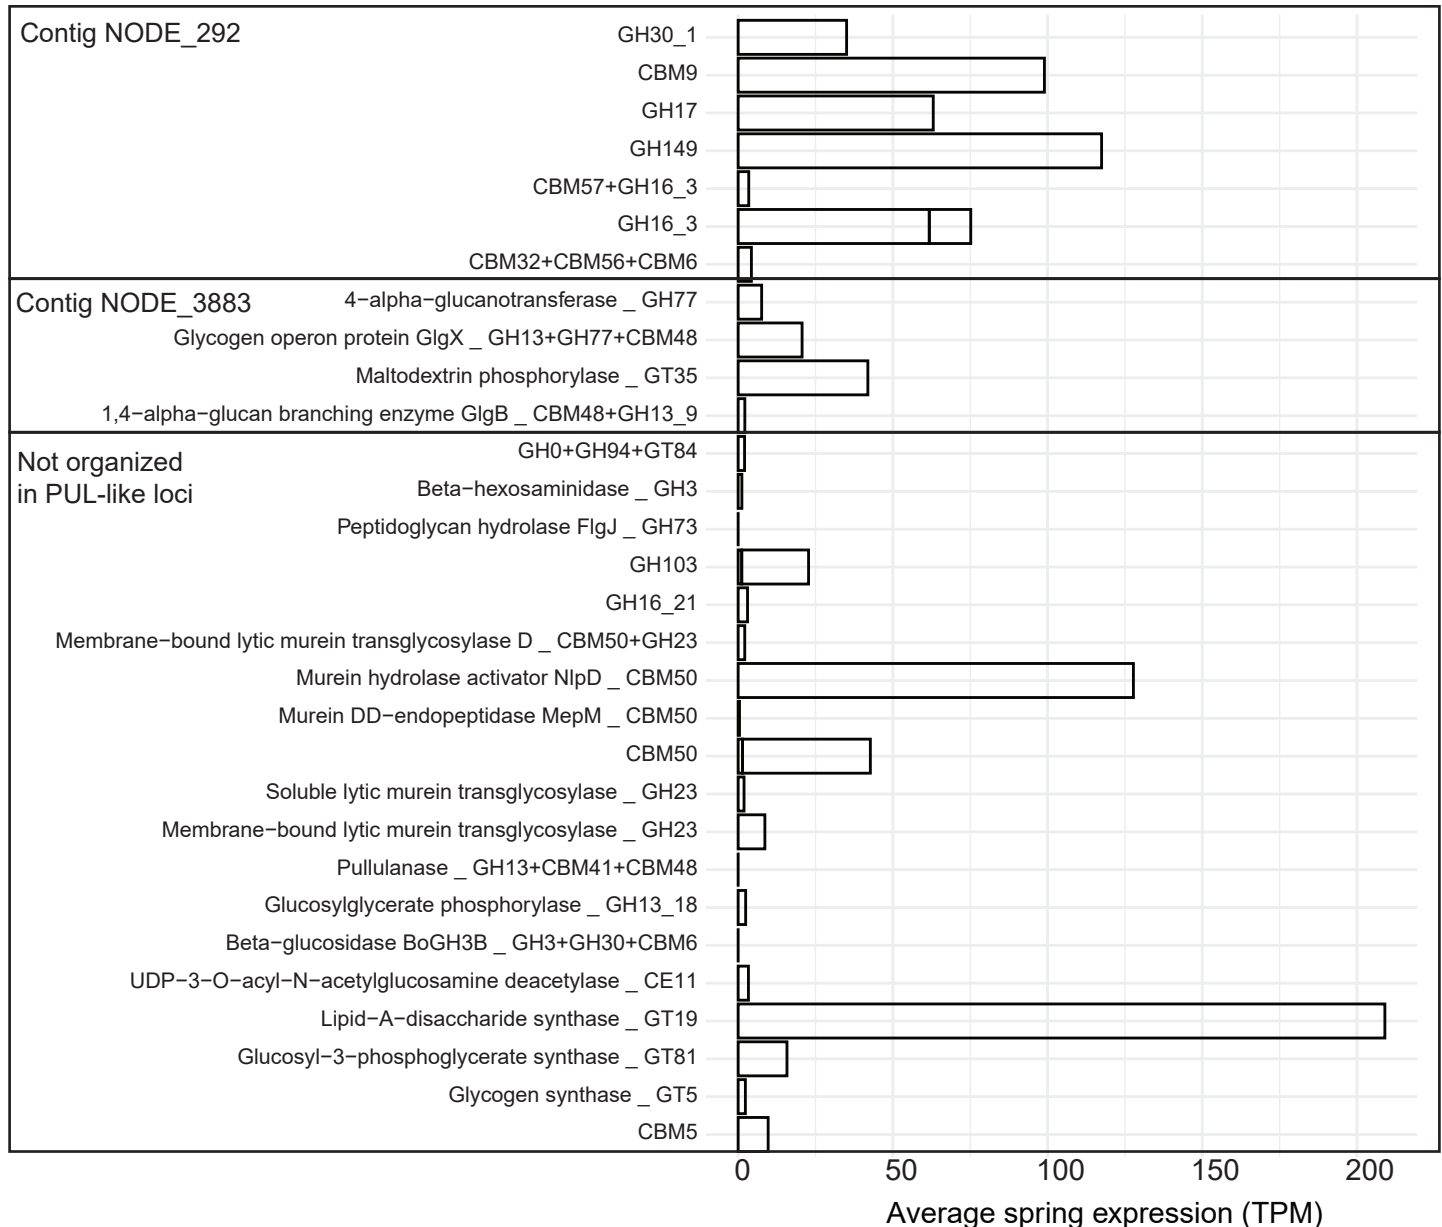

**Supplementary Figure S6. Genomic organization (A) and expression of CAZymes (B) in Colwellia bin Sval\_st7\_May.bin.39.** A, In two contigs, PUL-like loci, defined by at least 2 CAZymes within a sliding window of 10 genes, were detected. Additionally, several other degradative CAZymes and CBM were found in the bin. B, Expression of genes from the two PUL-like structures in the spring metatranscriptomes. Stacked bars show the sum of expression of two different genes with identical annotations. Shown open reading frames/genes were not expressed in winter metatranscriptomes except for GH103 and GH73 with low expression levels of 0.2 TPM. GH73 are peptidoglycan hydrolases and slightly higher expressed than in spring metatranscriptomes.

**Supplementary Table S1. Overview of samples from Isfjorden, Svalbard.** OSW, overlying seawater; PW, porewater

| sample ID         | sample type    | sampling date | station | metagenome | meta-transcriptome<br><i>full</i> | meta-transcriptome<br><i>rRNA depletion</i> | sugar analysis |
|-------------------|----------------|---------------|---------|------------|-----------------------------------|---------------------------------------------|----------------|
| Dec17_st5         | bulk sediments | December 2017 | 5       | x          | x                                 | x                                           | x              |
| Dec17_st7         | bulk sediments | December 2017 | 7       |            | x                                 |                                             | x              |
| Feb18_st5         | bulk sediments | February 2018 | 5       | x          | x                                 | x                                           | x              |
| Feb18_st7         | bulk sediments | February 2018 | 7       |            | x                                 |                                             | x              |
| May18_st5         | bulk sediments | May 2018      | 5       | x          | xxx                               | x                                           | x              |
| May18_st7         | bulk sediments | May 2018      | 7       | x          | x                                 |                                             | x              |
| Dec18_st5         | bulk sediments | December 2018 | 5       | x          |                                   |                                             | x              |
| Dec18_st7         | bulk sediments | December 2018 | 7       |            |                                   |                                             | x              |
| Apr19_st5         | bulk sediments | April 2019    | 5       | x          |                                   |                                             | x              |
| Apr19_st7         | bulk sediments | April 2019    | 7       |            |                                   |                                             | x              |
| Apr22_st5_7-bulk  | bulk sediments | April 2022    | 5       |            |                                   |                                             | x              |
| Apr22_st5_8-bulk  | bulk sediments | April 2022    | 5       |            |                                   |                                             | x              |
| Apr22_st5_11-bulk | bulk sediments | April 2022    | 5       |            |                                   |                                             | x              |
| Apr22_st5_12-bulk | bulk sediments | April 2022    | 5       |            |                                   |                                             | x              |
| Apr22_st5_7-PW    | Porewater      | April 2022    | 5       |            |                                   |                                             | x              |
| Apr22_st5_8-PW    | Porewater      | April 2022    | 5       |            |                                   |                                             | x              |
| Apr22_st5_11-PW   | Porewater      | April 2022    | 5       |            |                                   |                                             | x              |
| Apr22_st5_12-PW   | Porewater      | April 2022    | 5       |            |                                   |                                             | x              |
| Apr22_st5_7-OSW   | OSW            | April 2022    | 5       |            |                                   |                                             | x              |
| Apr22_st5_8-OSW   | OSW            | April 2022    | 5       |            |                                   |                                             | x              |
| Apr22_st5_11-OSW  | OSW            | April 2022    | 5       |            |                                   |                                             | x              |
| Apr22_st5_12-OSW  | OSW            | April 2022    | 5       |            |                                   |                                             | x              |

**Supplementary Table S2: Basic statistics for 6 metagenomic and 11 metatranscriptomic datasets obtained from Svalbard sediments.**

| dataset ID         | type              |                | no. reads<br>(raw reads) | no reads<br>(after qc) | [%] left after<br>quality control | redundancy<br>(nonpareil) | contigs<br>(>1kb) | N50   | bins | reads<br>(mRNA) |
|--------------------|-------------------|----------------|--------------------------|------------------------|-----------------------------------|---------------------------|-------------------|-------|------|-----------------|
| Sval_Dec_2017      | metagenome        |                | 139,473,476              | 103,802,669            | 74.42                             | 0.49                      | 973,058           | 1,781 | 34   | -               |
| Sval_Feb_2018      | metagenome        |                | 125,891,034              | 107,222,317            | 85.17                             | 0.49                      | 1,013,048         | 1,859 | 35   | -               |
| Sval_May_2018_st5  | metagenome        |                | 133,679,990              | 115,909,120            | 86.71                             | 0.47                      | 1,084,287         | 1,765 | 40   | -               |
| Sval_May_2018_st7  | metagenome        |                | 135,845,280              | 118,392,707            | 87.15                             | 0.45                      | 1,026,676         | 1,834 | 42   | -               |
| Sval_Dec_2018      | metagenome        |                | 98,660,349               | 98,109,189             | 99.44                             | 0.46                      | 671,159           | 1,718 | 16   | -               |
| Sval_Apr_2019      | metagenome        |                | 91,594,369               | 91,031,268             | 99.39                             | 0.50                      | 562,393           | 1,605 | 16   | -               |
| Sval_Dec_st5_dep   | metatranscriptome | rRNA depletion | 104,435,692              | 90,587,256             | 86.74                             | -                         | -                 | -     | -    | 72,961,714      |
| Sval_Dec_st5_full  | metatranscriptome |                | 160,797,588              | 117,796,866            | 73.26                             | -                         | -                 | -     | -    | 3,608,598       |
| Sval_Dec_st7_full  | metatranscriptome |                | 173,253,912              | 156,932,902            | 90.58                             | -                         | -                 | -     | -    | 7,688,798       |
| Sval_Feb_st5_dep   | metatranscriptome | rRNA depletion | 84,267,052               | 55,112,272             | 65.40                             | -                         | -                 | -     | -    | 44,000,378      |
| Sval_Feb_st5_full  | metatranscriptome |                | 162,431,412              | 118,600,342            | 73.02                             | -                         | -                 | -     | -    | 3,556,094       |
| Sval_Feb_st7_full  | metatranscriptome |                | 163,666,564              | 144,462,378            | 88.27                             | -                         | -                 | -     | -    | 4,103,232       |
| Sval_May_st5_dep   | metatranscriptome | rRNA depletion | 96,831,938               | 87,716,354             | 90.59                             | -                         | -                 | -     | -    | 54,005,690      |
| Sval_May_st7_full  | metatranscriptome |                | 178,072,220              | 166,552,672            | 93.53                             | -                         | -                 | -     | -    | 4,082,580       |
| Sval_May1 st5_full | metatranscriptome |                | 157,004,704              | 127,115,722            | 80.96                             | -                         | -                 | -     | -    | 3,871,750       |
| Sval_May2_st5_full | metatranscriptome |                | 178,707,738              | 156,811,100            | 87.75                             | -                         | -                 | -     | -    | 2,038,998       |
| Sval_May3_st5_full | metatranscriptome |                | 186,663,216              | 169,326,994            | 90.71                             | -                         | -                 | -     | -    | 4,500,940       |

Supplementary Table S3: Statistics of high-quality bins.

| Bin ID               | Taxonomic classification                                                                                            | Completeness | Contamination | Genome size | contigs | N50    | 16S rRNA gene |
|----------------------|---------------------------------------------------------------------------------------------------------------------|--------------|---------------|-------------|---------|--------|---------------|
|                      |                                                                                                                     | [%]          | [%]           | [bp]        | [no.]   | [bp]   | [yes/no]      |
| Sval_Feb.bin.32      | d__Bacteria;p__Actinomycetota;c__Acidimicrobiia;o__Acidimicrobiales;f__Ilumatobacteraceae;g__Ilumatobacter_A;s__    | 92.5         | 8.12          | 4,821,387   | 876     | 6,911  | no            |
| Sval_st7_May.bin.207 | d__Bacteria;p__Actinomycetota;c__Acidimicrobiia;o__Acidimicrobiales;f__Ilumatobacteraceae;g__Ilumatobacter_A;s__    | 85.5         | 5.13          | 3,751,020   | 839     | 5,208  | no            |
| Sval_st7_May.bin.7   | d__Bacteria;p__Actinomycetota;c__Acidimicrobiia;o__Acidimicrobiales;f__SZUA-35;g__s__                               | 87.1         | 5.59          | 3,564,160   | 362     | 14,464 | yes           |
| Sval_May.bin.58      | d__Bacteria;p__Actinomycetota;c__Acidimicrobiia;o__UBA5794;f__JAENVV01;g__s__                                       | 78.2         | 5.98          | 1,985,680   | 347     | 7,626  | yes           |
| Sval_Dec.bin.7       | d__Bacteria;p__Actinomycetota;c__Acidimicrobiia;o__UBA5794;f__UBA4744;g__UBA4744;s__                                | 65.4         | 9.13          | 2,053,696   | 524     | 5,023  | no            |
| Sval_May.bin.130     | d__Bacteria;p__Actinomycetota;c__Acidimicrobiia;o__UBA5794;f__UBA5794;g__JAHEEL01;s__                               | 87.6         | 3.94          | 2,448,020   | 490     | 6,341  | yes           |
| Sval_Dec.bin.66      | d__Bacteria;p__Actinomycetota;c__Acidimicrobiia;o__UBA5794;f__UBA5794;g__B3-G11;s__                                 | 87.3         | 4.89          | 2,256,330   | 599     | 4,231  | yes           |
| Sval_Feb.bin.86      | d__Bacteria;p__Bacteroidota;c__Bacteroidia;o__Flavobacteriales;f__JAHECK01;g__JAHECK01;s__                          | 89.0         | 9.21          | 3,558,031   | 741     | 6,250  | no            |
| Sval_st7_May.bin.218 | d__Bacteria;p__Bacteroidota;c__Bacteroidia;o__Flavobacteriales;f__Crocinitomicaceae;g__UBA4466;s__                  | 78.5         | 5.15          | 2,310,277   | 501     | 5,574  | no            |
| Sval1819_Apr.bin.26  | d__Bacteria;p__Bacteroidota;c__Bacteroidia;o__Flavobacteriales;f__Crocinitomicaceae;g__UBA4466;s__                  | 94.7         | 1.80          | 2,906,039   | 366     | 12,393 | yes           |
| Sval_st7_May.bin.35  | d__Bacteria;p__Bacteroidota;c__Bacteroidia;o__Flavobacteriales;f__Flavobacteriaceae;g__GCA-2733415;s__              | 97.8         | 2.34          | 2,900,808   | 175     | 26,888 | no            |
| Sval_st7_May.bin.65  | d__Bacteria;p__Bacteroidota;c__Bacteroidia;o__Flavobacteriales;f__Flavobacteriaceae;g__GCA-2733415;s__              | 97.4         | 1.26          | 2,404,623   | 91      | 69,552 | no            |
| Sval_May.bin.96      | d__Bacteria;p__Bacteroidota;c__Bacteroidia;o__Flavobacteriales;f__Flavobacteriaceae;g__Lutimonas;s__                | 92.7         | 1.15          | 3,145,817   | 231     | 21,458 | no            |
| Sval_st7_May.bin.171 | d__Bacteria;p__Bacteroidota;c__Bacteroidia;o__Flavobacteriales;f__Flavobacteriaceae;g__Lutimonas;s__                | 83.7         | 4.57          | 2,949,660   | 371     | 11,197 | no            |
| Sval_st7_May.bin.40  | d__Bacteria;p__Bacteroidota;c__Bacteroidia;o__Flavobacteriales;f__Flavobacteriaceae;g__SCGC-AAA160-P02;s__          | 95.1         | 1.79          | 2,712,007   | 169     | 26,245 | no            |
| Sval_st7_May.bin.142 | d__Bacteria;p__Bacteroidota;c__Bacteroidia;o__Flavobacteriales;f__Flavobacteriaceae;g__SHLJ01;s__                   | 93.0         | 0.99          | 2,823,433   | 186     | 23,121 | no            |
| Sval_Dec.bin.161     | d__Bacteria;p__Desulfobacterota;c__Desulfobacteria;o__Desulfobacterales;f__JAFDCJ01;g__JAFDCJ01;s__                 | 83.2         | 0.97          | 4,064,951   | 581     | 9,140  | no            |
| Sval_Feb.bin.57      | d__Bacteria;p__Desulfobacterota;c__Desulfobacteria;o__Desulfobacterales;f__JAFDCJ01;g__JAFDCJ01;s__                 | 53.7         | 2.61          | 3,516,276   | 904     | 4,227  | no            |
| Sval_Feb.bin.151     | d__Bacteria;p__Desulfobacterota;c__Desulfobacteria;o__Desulfobacterales;f__Desulfosarcinaceae;g__Desulfosarcina;s__ | 76.9         | 5.18          | 4,266,660   | 1,195   | 3,908  | no            |
| Sval_Feb.bin.47      | d__Bacteria;p__Desulfobacterota;c__Desulfobacteria;o__Desulfobacterales;f__Desulfosarcinaceae;g__Desulfosarcina;s__ | 91.6         | 1.79          | 4,984,765   | 655     | 11,167 | no            |
| Sval_Dec.bin.130     | d__Bacteria;p__Desulfobacterota;c__Desulfobulbia;o__Desulfobulbales;f__Desulfocapsaceae;g__MADRE3;s__               | 92.4         | 1.92          | 4,863,787   | 827     | 7,810  | no            |
| Sval_Feb.bin.76      | d__Bacteria;p__Planctomycetota;c__UBA1135;o__UBA1135;f__UBA1135;g__s__                                              | 67.4         | 2.25          | 1,697,842   | 558     | 3,225  | no            |
| Sval_st7_May.bin.39  | d__Bacteria;p__Proteobacteria;c__Gammaproteobacteria;o__Enterobacteriales;f__Alteromonadaceae;g__Colwellia_A;s__    | 95.9         | 1.92          | 3,653,294   | 194     | 28,410 | no            |
| Sval_Feb.bin.11      | d__Bacteria;p__Proteobacteria;c__Gammaproteobacteria;o__GCA-001735895;f__GCA-001735895;g__GCA-001735895;s__         | 93.5         | 9.01          | 4,860,664   | 484     | 16,021 | yes           |
| Sval_Feb.bin.110     | d__Bacteria;p__Proteobacteria;c__Gammaproteobacteria;o__GCA-001735895;f__GCA-001735895;g__GCA-001735895;s__         | 82.8         | 7.27          | 3,718,874   | 717     | 6,494  | no            |
| Sval_st7_May.bin.17  | d__Bacteria;p__Pseudomonadota;c__Gammaproteobacteria;o__Pseudomonadales;f__Porticococcaceae;g__HTCC2207;sp905182275 | 91.6         | 4.01          | 2,378,634   | 381     | 8,914  | yes           |
| Sval_Dec.bin.80      | d__Bacteria;p__Pseudomonadota;c__Gammaproteobacteria;o__UBA9214;f__UBA9214;g__s__                                   | 84.2         | 14.69         | 3,241,495   | 605     | 7,338  | no            |
| Sval_Feb.bin.103     | d__Bacteria;p__Pseudomonadota;c__Gammaproteobacteria;o__UBA9214;f__UBA9214;g__UBA9214;s__                           | 78.1         | 5.66          | 2,247,594   | 530     | 4,764  | no            |
| Sval_Dec.bin.61      | d__Bacteria;p__Pseudomonadota;c__Gammaproteobacteria;o__Woeseiales;f__Woeseiaceae;g__JAACFB01;s__                   | 79.7         | 9.77          | 2,683,288   | 246     | 13,937 | no            |
| Sval_Dec.bin.29      | d__Bacteria;p__Pseudomonadota;c__Gammaproteobacteria;o__Woeseiales;f__Woeseiaceae;g__UBA1847;s__                    | 84.0         | 3.02          | 3,236,586   | 134     | 39,867 | yes           |
| Sval_May.bin.123     | d__Bacteria;p__Pseudomonadota;c__Gammaproteobacteria;o__Woeseiales;f__Woeseiaceae;g__UBA1847;s__                    | 89.0         | 0.79          | 3,267,154   | 127     | 42,481 | no            |
| Sval_May.bin.64      | d__Bacteria;p__Pseudomonadota;c__Gammaproteobacteria;o__Woeseiales;f__Woeseiaceae;g__UBA1847;s__                    | 75.3         | 6.90          | 2,965,941   | 443     | 8,357  | no            |
| Sval_st7_May.bin.4   | d__Bacteria;p__Pseudomonadota;c__Gammaproteobacteria;o__Woeseiales;f__Woeseiaceae;g__UBA1847;s__                    | 79.0         | 2.32          | 2,071,716   | 205     | 12,561 | no            |
| Sval_st7_May.bin.74  | d__Bacteria;p__Pseudomonadota;c__Gammaproteobacteria;o__Xanthomonadales;f__Marinicellaceae;g__NORP309;s__           | 89.7         | 6.01          | 2,926,992   | 244     | 18,992 | no            |
| Sval_st7_May.bin.147 | d__Bacteria;p__Pseudomonadota;c__Gammaproteobacteria;o__Xanthomonadales;f__SZUA-36;g__JAJRA01;s__                   | 90.9         | 8.92          | 4,020,067   | 773     | 6,499  | yes           |
| Sval1819_Dec.bin.2   | d__Bacteria;p__Pseudomonadota;c__Gammaproteobacteria;o__Xanthomonadales;f__SZUA-36;g__SZUA-36;s__                   | 63.8         | 2.54          | 1,841,078   | 521     | 3,923  | no            |



**Supplementary Table S4. Genomic organization of CAZymes in Bacteroidia bins. +, genes within the same open reading frame.**

| bin ID               | reg.* contig ID | Genomic organization of CAZymes as PUL or PUL-like structures*                                        | predicted substrate usage (www.cazy.org) | other degradative CAZymes and CBM* (not organized in PUL-like structures)                                                                                               |
|----------------------|-----------------|-------------------------------------------------------------------------------------------------------|------------------------------------------|-------------------------------------------------------------------------------------------------------------------------------------------------------------------------|
| Sval_st7_May.bin.40  | NODE_216        | Start of contig, ..., SusCD CBM4+CBM4,GH16_3, GH2, GH149, GH30_1, GH17, ..., end                      | laminarin, $\beta$ -glycans              |                                                                                                                                                                         |
|                      | NODE_59         | start of contig, ..., GH5_4, GH3, GH10, GH10, GH43_1, GH10, PL9+CBM22, GH30, SusCD ..., end of contig | xylane, xylose                           | GH16+CBM54, GH3, GH130, GH13_31, GH43_12, GH92, GH81+CBM6, GH3, GH109, GH39, GH125, GH23+CBM50, GH20+CBM32, GH0+GH113, CE11, CE1, CE14, CE4                             |
|                      | NODE_650        | start of contig, ..., GH92, GH92+GH94, GH92, SusC ..., end of contig                                  | mannose                                  |                                                                                                                                                                         |
|                      | NODE_711        | start of contig- GH30_1, GH16, GH5_46+CBM6+CBM6, SusC ..., end of contig                              | $\beta$ -glycans                         |                                                                                                                                                                         |
|                      | NODE_848        | start of contig, ..., SusC GH92, GH92, GH92+GH94, GH3, GH3+CBM6, ..., end of contig                   | mannose                                  |                                                                                                                                                                         |
| Sval_st7_May.bin.65  | NODE_1389       | start of contig, ..., PL7_5, PL6_1, PL6+CBM32, PL17_2+PL17, SusCD ..., end of contig                  | alginate                                 | GH23, GH113, GH25, CBM50+GH23, GH3, GH5_42, GH73+CBM50,                                                                                                                 |
|                      | NODE_424        | start of contig, GH10, GH3, SusCD ..., end of contig                                                  | xylane, xylose                           | CBM32+GH85, GH88, CE11, CE14, CE4,                                                                                                                                      |
| Sval_st7_May.bin.218 | NODE_2898       | start of contig, ..., SusCD GH16+CBM13+CBM6, end of contig                                            | $\beta$ -glycans                         | CBM50+GH23, GH3, GH92, GH2, GH1, GH113, GH23, GH20, CE14, CE1, CE4                                                                                                      |
| Sval_st7_May.bin.35  | NODE_30472      | Start of contig-GH95+CBM13+CBM32+CBM51, GH168, GH30_2, - ..., end of contig                           | fucose, fucan, xylane                    | GH3, GH157, GH20, GH25, GH18, CBM32+GH85, GH29, GH113, GH3, GH23, GH5_42, GH157, CBM50+GH23, CE1, CE11, CE14, CE4, PL6+PL6_1                                            |
| Sval_st7_May.bin.142 | NODE_649        | start of contig, ..., GH30_1, GH16+CBM4+CBM54, SusCD ..., end of contig                               | laminarin, $\beta$ -glycans              |                                                                                                                                                                         |
|                      | NODE_2327       | start of contig, ..., PL7, SusCD -PL17_2- ... - PL7_5- ... - end of contig                            | alginate                                 |                                                                                                                                                                         |
|                      | NODE_10         | start of contig, ..., GH92, GH20+CBM32, GH2, CE4, - ..., end of contig                                | mannose, peptidoglycan                   | GH13, GH31, GH97, GH113, GH23, CBM48+GH13_9, GH0, GH30_1, GH17, CBM48+GH13, GH3,                                                                                        |
|                      | NODE_230        | start of contig-GH13, GH31, GH13_19, GH97, GH13, - ..., end of contig                                 | $\alpha$ -glycans                        | GH16+CBM4, GH2+CBM32+CBM67, GH53, CBM50+GH23, GH73+CBM50, GH158, CE11, CE14                                                                                             |
|                      | NODE_29972      | start of contig- ..., GH17, GH17, GH17, - end of contig                                               | laminarin, $\beta$ -glycans              |                                                                                                                                                                         |
|                      | NODE_56         | start of contig, ...-GH2+CBM51+CBM67, GH2+CBM51+CBM67, GH63, - ..., end of contig                     | mannose                                  |                                                                                                                                                                         |
|                      | NODE_5907       | start- GH158, GH0, GH16+CBM11+CBM13+CBM32+CBM4+CBM54+CBM56+CBM6, CBM4, GH30_1, - end of contig        | $\beta$ -glycans                         |                                                                                                                                                                         |
| Sval_st7_May.bin.171 | NODE_9839       | Start of contig- PL17_2, SusCD ..., end of contig                                                     | alginate                                 | GH17, GH3, GH94, GH0+GH13, CE1+GH10, GH20+CBM32, GH149, GH144, GH5_48, GH23, GH20,                                                                                      |
|                      | NODE_1447       | Start of contig, SusCD GH16_3, ..., end of contig                                                     | laminarin, $\beta$ -glycans              |                                                                                                                                                                         |
|                      | NODE_1541       | Start of contig-GH13_19, GH13, GH65, SusC CBM48+GH13, ..., end of contig                              | $\alpha$ -glycans                        | GH13+CBM25+CBM41+CBM48+CBM68, CBM50+GH23, GH73+CBM50, GH3+CBM6, GH16, GH5_46+CBM6+CBM6, GH109,                                                                          |
|                      | NODE_12460      | Start of contig, ..., GH16_3, GH17, GH17, GH17, - end of contig                                       | laminarin, $\beta$ -glycans              | GH2+CBM32+CBM67, GH157, GH29, GH2, GH53, GH130, GH26, PL7, PL7_5, PL12, CE1, CE11, CE14                                                                                 |
|                      | NODE_8488       | Start of contig- GH158, GH17, GH149, GH30_1, - end of contig                                          | laminarin, $\beta$ -glycans              |                                                                                                                                                                         |
| Sval_May.bin.96      | NODE_14         | start of contig, ..., CBM48+GH13, SusCD , GH65, GH13, GH31, GH13_19, GH13_38, ..., end of contig      | glycogen, $\alpha$ -glycans              |                                                                                                                                                                         |
|                      | NODE_2396       | start of contig- PL17_2, SusCD , PL7, PL7, ..., end of contig                                         | alginate                                 | GH20, GH3, GH5_46+CBM6+CBM6, GH26, GH3, GH9+CBM2+CBM4,                                                                                                                  |
|                      | NODE_309        | start of contig, ..., PL7, PL7, SusCD , PL7_5, PL7_5, PL12, PL6+PL6_1, ..., end of contig             | alginate                                 | GH0+GH13, GH23, CBM48+GH13_9, GH31, GH94, GH73+CBM50, GH109, GH0, GH2+CBM51+CBM67,                                                                                      |
|                      | NODE_2289       | start of contig, ..., GH94, GH16_3, GH17, GH17, GH17, - end of contig                                 | laminarin, $\beta$ -glycans              | GH95+CBM13+CBM51, GH16, GH130, GH16+CBM13+CBM32+CBM4+CBM54+CBM56+CBM6, GH29, GH3+CBM6, CE4, CE14, CE11, PL6+PL6_1                                                       |
|                      | NODE_25         | start of contig, ..., GH20, GH3, GH3, - ..., end of contig                                            | xylose, peptidoglycan                    |                                                                                                                                                                         |
|                      | NODE_9324       | start of contig, ..., GH16+CBM4, GH16+CBM4+CBM54+CBM6, GH30_1, - ..., end of contig                   | laminarin, $\beta$ -glycans              |                                                                                                                                                                         |
| Sval1819_Apr.bin.26  |                 | -                                                                                                     | -                                        | GH20+CBM32, GH73+CBM50, GH113, GH16+CBM11+CBM13, GH23, GH25, GH3, GH2, GH92, GH74, CE11, CE14, CE4                                                                      |
| Sval_Feb.bin.86      |                 | -                                                                                                     | -                                        | GH130, CBM48+GH13, GH31, GH13_23, GH2+CBM51+CBM67, GH73, GH158, GH23, GH38, GH65, GH29, GH2, GH92, CBM50+GH23, GH13, GH3, GH63, GH20, GH23, GH76, CE14, CE15, CE11, CE4 |

reg., regulation. Color indicates if bins were upregulated in spring (green) or were unregulated and evenly expressed throughout the year (grey; assignment taken from Figure 3)

\*, PUL are defined based on the presence of a pair of susC- and susD-like transporter genes and  $\geq 2$  CAZyme genes (GHs, PLs, CE or CBMs) and PUL-like loci based on the presence of  $\geq 1$  CAZyme, both within a 10-genes-sliding window).

• other CAZymes in contigs not matching the criteria of PUL and PUL-like

**Supplementary Table S6. Glycan concentrations in porewater (PW) and overlying seawater (OSW) from Isforden, Svalbard.** Glycans from OSW and porewater were acid hydrolyzed and the resulting monosaccharides were measured by HPAEC-PAD analysis. Concentrations in PW were 18fold higher than in OSW. Values in surface seawater were in the range obtained from controls with demineralized water in dialysis bags (data not shown). Bd, below detection; bt, below threshold (values measured for low-concentrated calibration standards indicated a loss of detector sensitivity with time, thus a threshold concentration for each monosaccharide was set to the value at which the variation between two injections was smaller than  $\pm 20\%$ . Values lower than the threshold concentrations defined for each monosaccharide were rejected).

| ID         | Replicate | Sample type | Arabinose<br>[ $\mu\text{g C L}^{-1}$ ] | Fucose<br>[ $\mu\text{g C L}^{-1}$ ] | Galactosamine<br>[ $\mu\text{g C L}^{-1}$ ] | Galactose<br>[ $\mu\text{g C L}^{-1}$ ] | Glucosamine<br>[ $\mu\text{g C L}^{-1}$ ] | Glucose<br>[ $\mu\text{g C L}^{-1}$ ] | Mannose<br>[ $\mu\text{g C L}^{-1}$ ] | Rhamnose<br>[ $\mu\text{g C L}^{-1}$ ] | Xylose<br>[ $\mu\text{g C L}^{-1}$ ] | Sum<br>[ $\mu\text{g C L}^{-1}$ ] |
|------------|-----------|-------------|-----------------------------------------|--------------------------------------|---------------------------------------------|-----------------------------------------|-------------------------------------------|---------------------------------------|---------------------------------------|----------------------------------------|--------------------------------------|-----------------------------------|
| Apr_7-OSW  | 1         | OSW         | bd                                      | bd                                   | bt                                          | bt                                      | bt                                        | bt                                    | bt                                    | bd                                     | bt                                   | 0.0                               |
| Apr_7-OSW  | 2         | OSW         | bd                                      | bd                                   | bt                                          | bt                                      | bt                                        | bt                                    | bt                                    | bd                                     | bt                                   | 0.0                               |
| Apr_8-OSW  | 1         | OSW         | bd                                      | bt                                   | bt                                          | bt                                      | bt                                        | 22.9                                  | bt                                    | bd                                     | bt                                   | 22.9                              |
| Apr_8-OSW  | 2         | OSW         | bd                                      | bt                                   | bt                                          | bt                                      | bt                                        | 17.2                                  | bt                                    | bd                                     | bt                                   | 17.2                              |
| Apr_11-OSW | 1         | OSW         | bd                                      | bt                                   | bt                                          | bt                                      | bt                                        | 43.2                                  | bd                                    | bd                                     | bt                                   | 43.2                              |
| Apr_11-OSW | 2         | OSW         | bd                                      | bt                                   | bt                                          | bt                                      | bt                                        | 45.5                                  | bt                                    | bd                                     | bt                                   | 45.5                              |
| Apr_12-OSW | 1         | OSW         | bt                                      | bt                                   | bt                                          | bt                                      | bt                                        | 58.2                                  | bt                                    | bd                                     | bt                                   | 58.2                              |
| Apr_12-OSW | 2         | OSW         | bt                                      | bt                                   | bt                                          | 14.4                                    | bt                                        | 151.2                                 | 44.8                                  | bd                                     | 95.0                                 | 305.4                             |
| Apr_7-PW   | 1         | PW          | 103.8                                   | 79.4                                 | bt                                          | 46.8                                    | 52.1                                      | 112.0                                 | bt                                    | bt                                     | 105.2                                | 499.2                             |
| Apr_7-PW   | 2         | PW          | 89.2                                    | 75.8                                 | bt                                          | 43.6                                    | 51.6                                      | 125.2                                 | bt                                    | bt                                     | 90.9                                 | 476.3                             |
| Apr_8-PW   | 1         | PW          | bt                                      | 186.6                                | 41.9                                        | 96.9                                    | 128.5                                     | 151.9                                 | bt                                    | bt                                     | 207.8                                | 813.6                             |
| Apr_8-PW   | 2         | PW          | 190.9                                   | 196.0                                | bt                                          | 100.7                                   | 144.0                                     | 163.7                                 | bt                                    | bt                                     | 206.9                                | 1,002.3                           |
| Apr_11-PW  | 1         | PW          | 399.4                                   | 365.4                                | 11.2                                        | 192.8                                   | 248.7                                     | 238.7                                 | bt                                    | bt                                     | 326.0                                | 1,782.2                           |
| Apr_11-PW  | 2         | PW          | 99.5                                    | 349.3                                | 83.5                                        | 186.6                                   | 247.3                                     | 240.4                                 | bt                                    | bt                                     | 318.8                                | 1,525.4                           |
| Apr_12-PW  | 1         | PW          | 262.9                                   | 289.4                                | 10.1                                        | 148.9                                   | 179.2                                     | 198.9                                 | bt                                    | bt                                     | 283.4                                | 1,372.8                           |
| Apr_12-PW  | 2         | PW          | 269.5                                   | 303.1                                | bt                                          | 148.9                                   | 176.7                                     | 190.5                                 | bt                                    | bt                                     | 295.8                                | 1,384.5                           |
